# Supplementary material for: A plasma fatty acid profile associated to type 2 diabetes development: from the CORDIOPREV study
Source: Springer Nature journal article supplement (doi:10.1007/s00394-021-02676-z), 2021-10-05
Supplement: MOESM1 [file 19730228]

**A plasma fatty acid profile associated to type 2 diabetes development: from the CORDIOPREV study.**

Alejandro Villasanta-Gonzalez, Juan Francisco Alcalá-Díaz, Cristina Vals-Delgado, Antonio Pablo Arenas, Magdalena P. Cardelo, Juan Luis Romero-Cabrera, Fernando Rodriguez-Cantalejo, Javier Delgado-Lista, Maria M. Malagon, Pablo Perez-Martinez, Matthias B. Schulze, Antonio Camargo\*, Jose Lopez-Miranda\*.

<sup>1</sup>Lipids and Atherosclerosis Unit, GC9 Nutrigenomics, Maimonides Biomedical Research Institute of Cordoba (IMIBIC), Reina Sofia University Hospital, University of Cordoba, Spain.

<sup>2</sup>CIBER Fisiopatología de la Obesidad y Nutrición (CIBEROBN), Instituto de Salud Carlos III, Cordoba, Spain.

<sup>3</sup>Department of Cell Biology, Physiology and Immunology, University of Cordoba, Córdoba, Spain.

<sup>4</sup>German Center for Diabetes Research, München-Neuherberg, Germany.

<sup>5</sup>Department of Molecular Epidemiology, German Institute of Human Nutrition Potsdam-Rehbrücke, Nuthetal, Germany [mschulze@dife.de](mailto:mschulze@dife.de).

<sup>6</sup>Germany Institute of Nutrition Science, University of Potsdam, Nuthetal, Germany.

\*These authors contributed equally to this work.

**Corresponding author:** Prof. Jose López-Miranda and Antonio Camargo, Lipids and Atherosclerosis Unit. Reina Sofia University Hospital. University of Cordoba. Av. Menendez Pidal, s/n. 14004 Córdoba, Spain. Phone: 34-957012830. FAX: +34-957218250 email: [jlopezmir@uco.es](mailto:jlopezmir@uco.es) and [antonio.camargo@imibic.org](mailto:antonio.camargo@imibic.org).

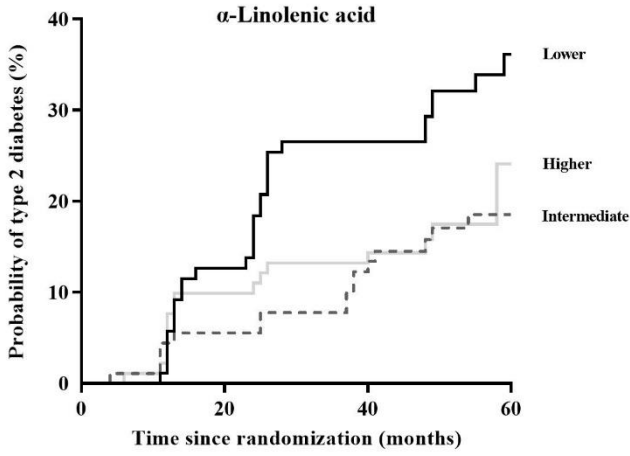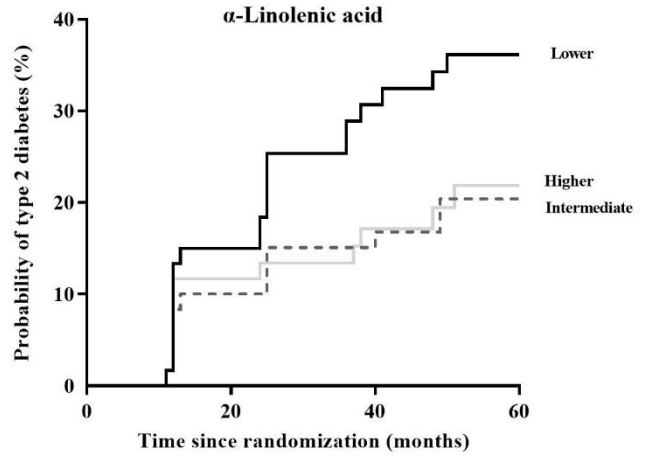

| Training     |            | HR   | 95% CI for HR |       |
|--------------|------------|------|---------------|-------|
|              |            |      | Lower         | Upper |
| Lower (ref.) |            | 1.00 | 1.00          | 1.00  |
| Intermediate | Unadjusted | 0.48 | 0.26          | 0.88  |
|              | Adjusted*  | 0.42 | 0.22          | 0.82  |
| Higher       | Unadjusted | 0.55 | 0.30          | 1.00  |
|              | Adjusted*  | 0.56 | 0.30          | 1.07  |

| Validation   |            | HR   | 95% CI for HR |       |
|--------------|------------|------|---------------|-------|
|              |            |      | Lower         | Upper |
| Lower (ref.) |            | 1.00 | 1.00          | 1.00  |
| Intermediate | Unadjusted | 0.52 | 0.26          | 1.06  |
|              | Adjusted*  | 0.62 | 0.30          | 1.31  |
| Higher       | Unadjusted | 0.56 | 0.28          | 1.14  |
|              | Adjusted*  | 0.61 | 0.29          | 1.29  |

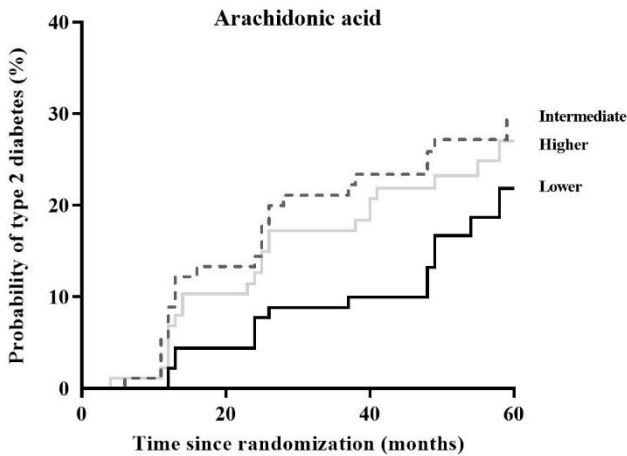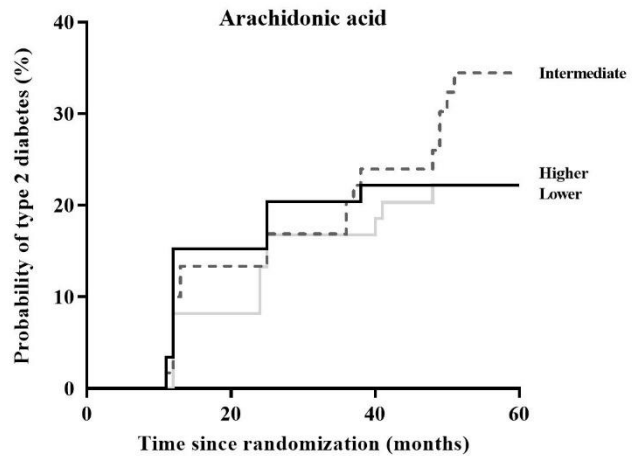

| Training     |            | HR   | 95% CI for HR |       |
|--------------|------------|------|---------------|-------|
|              |            |      | Lower         | Upper |
| Lower (ref.) |            | 1.00 | 1.00          | 1.00  |
| Intermediate | Unadjusted | 1.72 | 0.91          | 3.27  |
|              | Adjusted*  | 1.91 | 0.98          | 3.74  |
| Higher       | Unadjusted | 1.52 | 0.77          | 2.92  |
|              | Adjusted*  | 1.74 | 0.85          | 3.55  |

| Validation   |            | HR   | 95% CI for HR |       |
|--------------|------------|------|---------------|-------|
|              |            |      | Lower         | Upper |
| Lower (ref.) |            | 1.00 | 1.00          | 1.00  |
| Intermediate | Unadjusted | 1.46 | 0.72          | 2.96  |
|              | Adjusted*  | 1.46 | 0.69          | 3.08  |
| Higher       | Unadjusted | 0.96 | 0.44          | 2.06  |
|              | Adjusted*  | 1.02 | 0.44          | 2.34  |
